# Supplementary material for: Self-Isolation Due to COVID-19 Is Linked to Small One-Year Changes in Depression, Sleepiness, and Insomnia: Results from a Clinic for Sleep Disorders in Shiga Prefecture, Japan
Source: Int J Environ Res Public Health. 2020 Dec 2;17(23):8971. doi: 10.3390/ijerph17238971 (PMC7730558; doi:10.3390/ijerph17238971)
Supplement: Supplementary file 1 [file ijerph-17-08971-s001.pdf]

## Supplementary Material

**Table S1.** Frequency distribution of the restrictions on outing and meeting people.

|                                |     | Restrictions on Outing |    |    |    |    |    | Sum |
|--------------------------------|-----|------------------------|----|----|----|----|----|-----|
|                                |     | 1                      | 2  | 3  | 4  | 5  | 6  |     |
| Restrictions on meeting people | 1   | 11                     | 5  | 3  | 3  | 3  | 0  | 25  |
|                                | 2   | 3                      | 12 | 5  | 1  | 2  | 0  | 23  |
|                                | 3   | 1                      | 7  | 8  | 1  | 2  | 1  | 20  |
|                                | 4   | 0                      | 2  | 6  | 4  | 3  | 2  | 17  |
|                                | 5   | 2                      | 0  | 7  | 5  | 22 | 4  | 40  |
|                                | 6   | 0                      | 0  | 3  | 3  | 12 | 21 | 39  |
|                                | Sum | 17                     | 26 | 32 | 17 | 44 | 28 | 164 |

Answers: 1 = unchanged or increased (no reduction); 2 = slightly reduced (reduced to 80–90%); 3 = fairly reduced (reduced to 60–70%); 4 = reduced to about half (reduced to 40–50%); 5 = considerably reduced (reduced to 20–30%); 6 = not went out or no meeting with people (reduced to 0–10%).

**Table S2.** Demographic data, diagnosis, and treatment in the no/little self-isolation group and the strong self-isolation group.

|                                       | No/Little Self-Isolation<br>(N = 92) |         | Strong Self-Isolation<br>(N = 72) |         | p    |
|---------------------------------------|--------------------------------------|---------|-----------------------------------|---------|------|
| Demographic data                      |                                      |         |                                   |         |      |
| age at post-assessment                | 63.47                                | ± 13.09 | 63.78                             | ± 14.19 | .661 |
| sex (female)                          | 81                                   | (11)    | 62                                | (10)    | .445 |
| Diagnosis                             |                                      |         |                                   |         | .622 |
| Sleep related breathing disorders     | 88                                   | (95.7%) | 68                                | (94.4%) |      |
| Insomnia                              | 1                                    | (1.1%)  | 0                                 | (0%)    |      |
| Central disorders hypersomnolence     | 1                                    | (1.1%)  | 2                                 | (2.8%)  |      |
| Circadian rhythm sleep-wake disorders | 1                                    | (1.1%)  | 0                                 | (0%)    |      |
| Sleep related movement disorders      | 1                                    | (1.1%)  | 1                                 | (1.4%)  |      |
| Others                                | 0                                    | (0%)    | 1                                 | (1.4%)  |      |
| Treatment                             |                                      |         |                                   |         | .608 |
| Continuous Positive Airway Pressure   | 86                                   | (93.5%) | 67                                | (93.1%) |      |
| Adaptive servo ventilation            | 1                                    | (1.1%)  | 0                                 | (0%)    |      |
| Oral appliance                        | 1                                    | (1.1%)  | 1                                 | (1.4%)  |      |
| Anti-insomnia drug                    | 2                                    | (2.2%)  | 1                                 | (1.4%)  |      |
| Modafinil                             | 1                                    | (1.1%)  | 2                                 | (2.8%)  |      |
| Dopamine agonist                      | 1                                    | (1.1%)  | 0                                 | (0%)    |      |
| Follow-up                             | 0                                    | (0%)    | 1                                 | (1.4%)  |      |

99.4% of patients with sleep-related breathing disorders were obstructive sleep apnea.

**Table S3.** Result of Mann-Whitney U test of sleep habits, PHQ-9, ESS and AIS during COVID-19.

|                           |       | <b>Total</b>   |       | <b>No/Little</b> |       | <b>Strong</b>  | <b>U</b> | <b>p-value</b> |
|---------------------------|-------|----------------|-------|------------------|-------|----------------|----------|----------------|
| <i>N</i>                  |       | 164            |       | 92               |       | 72             |          |                |
| Wake -up time (hh:mm)     | 6:00  | (5:30to7:00)   | 6:00  | (5:05to7:00)     | 6:20  | (5:30to7:15)   | 3648.00  | .264           |
| Bedtime (hh:mm)           | 23:00 | (22:00to24:00) | 23:00 | (22:00to24:00)   | 23:00 | (22:00to24:00) | 3481.50  | .572           |
| Total sleep time (hh:mm)  | 6:30  | (5:30to7:30)   | 6:30  | (5:37to7:30)     | 6:30  | (5:30to7:30)   | 3373.50  | .837           |
| Sleep onset latency (min) | 10    | (5.6to20)      | 10    | (5to20)          | 10    | (8.2to30)      | 3520.50  | .482           |
| PHQ-9                     | 3.00  | (0.25to5.00)   | 3.00  | (0.25to6.00)     | 2.00  | (0.25to5.00)   | 3117.00  | .513           |
| ESS                       | 6.00  | (3.00to8.00)   | 6.00  | (3.00to8.00)     | 6.00  | (4.00to8.75)   | 3646.00  | .266           |
| AIS                       | 4.00  | (2.00to6.00)   | 3.00  | (2.00to6.00)     | 4.00  | (2.00to6.00)   | 3646.00  | .265           |

AIS = Athens Insomnia Scale, ESS = Epworth Sleepiness Scale, PHQ-9 = Patient Health Questionnaire.  
 No/Little self-isolation: outings  $\geq 30\%$  compared with one years before, Strong self-isolation: outings  $< 30\%$  compared with one years before. Numbers in parentheses represent the first to third quartiles.

**Table S4.** Result of Mann-Whitney U test of changes in sleep habits, PHQ-9, ESS and AIS.

|                                      |      | <b>Total</b>  |      | <b>No/Little</b> |       | <b>Strong</b> | <b>U</b> | <b>p-value</b> |
|--------------------------------------|------|---------------|------|------------------|-------|---------------|----------|----------------|
| <i>N</i>                             |      | 164           |      | 92               |       | 72            |          |                |
| Changes in Wake -up time (hh:mm)     | 0:00 | (-0:30to0:30) | 0:00 | (-0:30to0:17)    | 0:00  | (-0:26to0:30) | 0.22     | .825           |
| Changes in Bedtime (hh:mm)           | 0:00 | (-0:30to0:00) | 0:00 | (-0:30to0:00)    | -0:10 | (-0:45to0:00) | -1.11    | .267           |
| Changes in Total sleep time (hh:mm)  | 0:00 | (-0:30to0:30) | 0:00 | (-0:30to0:30)    | 0:15  | (-0:25to0:57) | 1.83     | .068           |
| Changes in Sleep onset latency (min) | 0    | (-2to5)       | 0    | (-2to5)          | 0     | (0to5)        | 0.41     | .685           |
| Changes in PHQ-9                     | 0.00 | (-2.00to1.00) | 0.00 | (-1.00to1.75)    | 0.00  | (-2.00to1.00) | -1.86    | .062           |
| Changes in ESS                       | 0.00 | (-2.00to1.00) | 1.00 | (-2.00to1.00)    | 0.00  | (-2.75to2.00) | 0.50     | .614           |
| Changes in AIS                       | 0.00 | (-1.00to1.00) | 0.00 | (-1.00to2.00)    | 0.00  | (-2.00to1.00) | -1.35    | .178           |

AIS = Athens Insomnia Scale, ESS = Epworth Sleepiness Scale, PHQ-9 = Patient Health Questionnaire.  
 No/Little self-isolation: outings  $\geq 30\%$  compared with one years before, Strong self-isolation: outings  $< 30\%$  compared with one years before. Numbers in parentheses represent the first to third quartiles.
